# Supplementary material for: A Suspicion Index to aid screening of early-onset Niemann-Pick disease Type C (NP-C)
Source: PubMed Central journal article supplement (PMC4957867; doi:10.1186/s12887-016-0641-7), 2016-07-22

### Controls

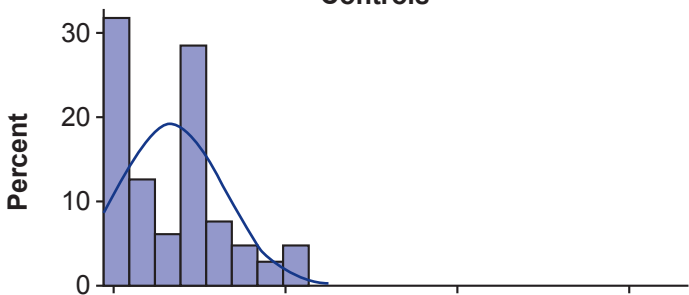

### Non-Cases

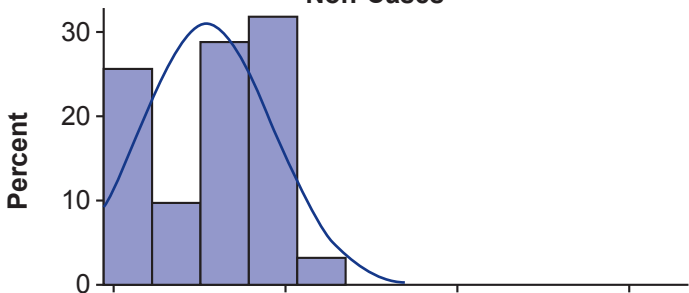

### Cases

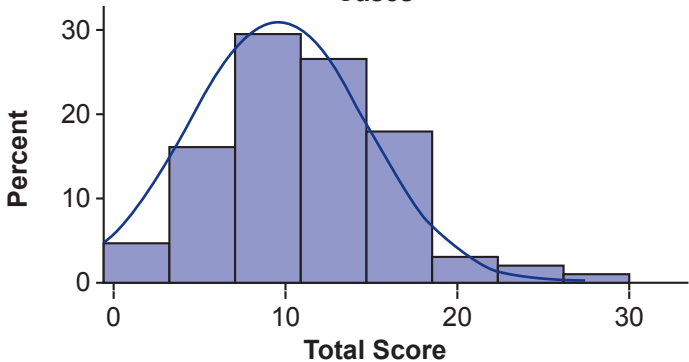

Supplement: 12887_2016_641_MOESM5_ESM.pdf [file 12887_2016_641_MOESM5_ESM.pdf]
